# Supplementary material for: The Conservation of Low Complexity Regions in Bacterial Proteins Depends on the Pathogenicity of the Strain and Subcellular Location of the Protein
Source: MDPI journal article supplement (doi:10.3390/genes12030451), 2021-03-22

(a)

|            |                                                               |
|------------|---------------------------------------------------------------|
| R9LP70     | LSDKAAAFPLTVERKQQYLETTGINDRLIMLLQDFEKEKEMSEVEKKINDTVKERIDQG   |
| A0A418MLU7 | LADAIAAQLPLKIKEKQEILESFNVSERLDRVLSSLADEREVLELEKEIHQRVRKQMEKT  |
| LON_ECOLI  | LADTIAAHMPLKLABKQSVLEMSDVNERLEYLMAMMESEIDLLQVEKRIRNRVKKQMEKS  |
|            | *:* ** :**.: **.*. ....** :: :.* ::::** *.:*.:::              |
| R9LP70     | QKDYYLREKIHAIREEELGDIVETDKDAESIRKRLAEEPYPEYIKDKVKEELMRYEMLPQA |
| A0A418MLU7 | QKEYYLREQMKAIQRELGDKEGRQGEIDELRDKMANLQLPELVAMRVDKEINRLERIPIS  |
| LON_ECOLI  | QREYYLNEQMKAIQKELGEMDDAPDENEALKRKIDAAKMPKEAKEKAEALQKLKMMSPM   |
|            | *.:***.*:::***.***: : :.:. : * : ... *: . : .:                |
| R9LP70     | NGESGVIKTYIDWLMDLPWWQTTKDNELESAQNILDEDHYGLAKVKERIMEYLA VKQMT  |
| A0A418MLU7 | SAEGTVARTFIDWLLDLPWTAKSVSIIDLGRAQRVLDAAHHYGLEKVKDRIIDYLAVQKLT |
| LON_ECOLI  | SAEATVVRGYIDWMVQVPWNARSKVKKDLRQAQEILDTDHYGLERVKDRILEYLA VQSRV |
|            | ..*.*.:***:::***: ** ** :** *****.***:***:*****:..            |

(b)

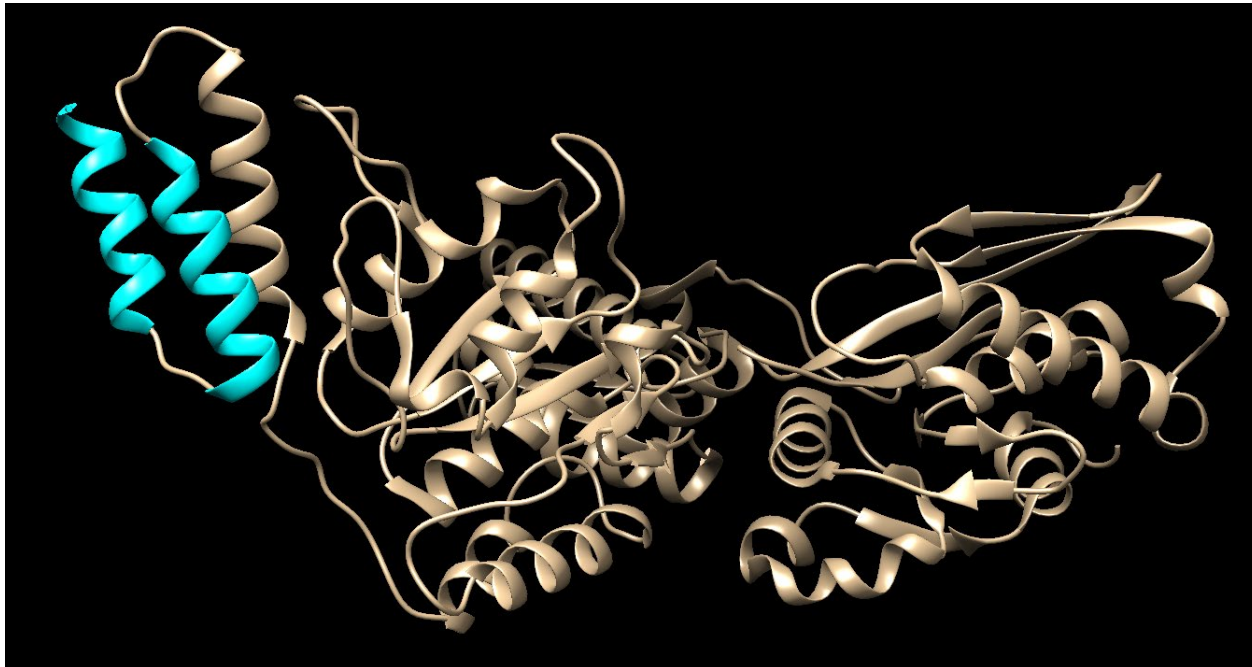

Supplement: s1 [file s1]
