# Supplementary figures and images for: The Conservation of Low Complexity Regions in Bacterial Proteins Depends on the Pathogenicity of the Strain and Subcellular Location of the Protein
Source: MDPI journal article supplement (doi:10.3390/genes12030451), 2021-03-22

**(a)**

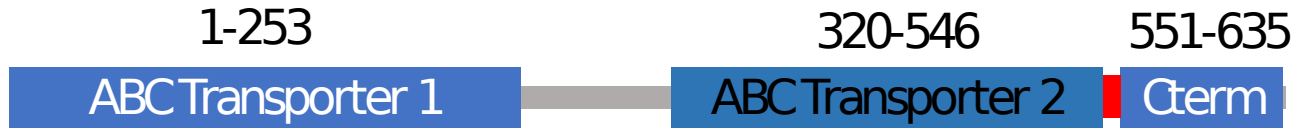

**(b)**

| 547-550           |                        |
|-------------------|------------------------|
| <b>UUP_EC0LI</b>  | <b>VKKTEEAAA AKAET</b> |
| <b>A0A0H3JCY6</b> | <b>VKKNEEPAAPKAET</b>  |

Supplement: s1 [file s1]

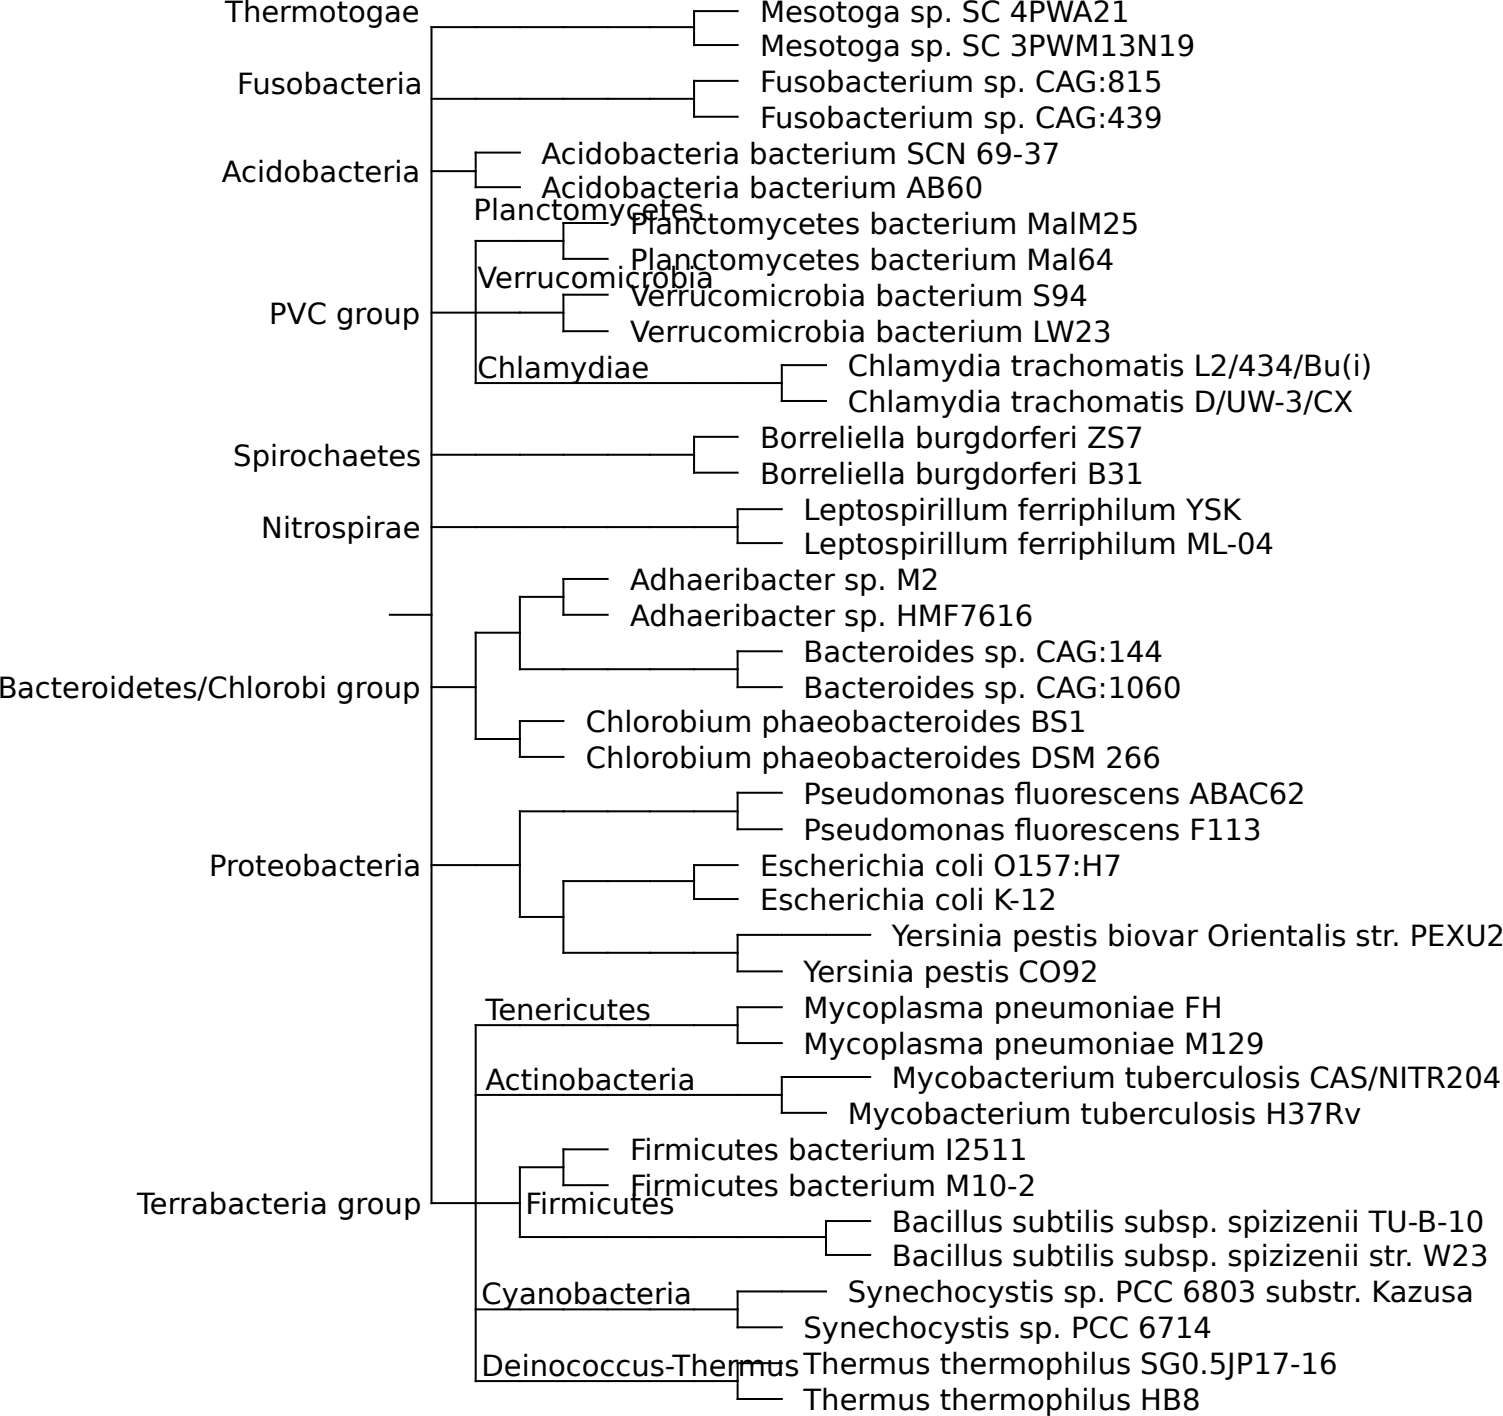

Supplement: s1 [file s1]

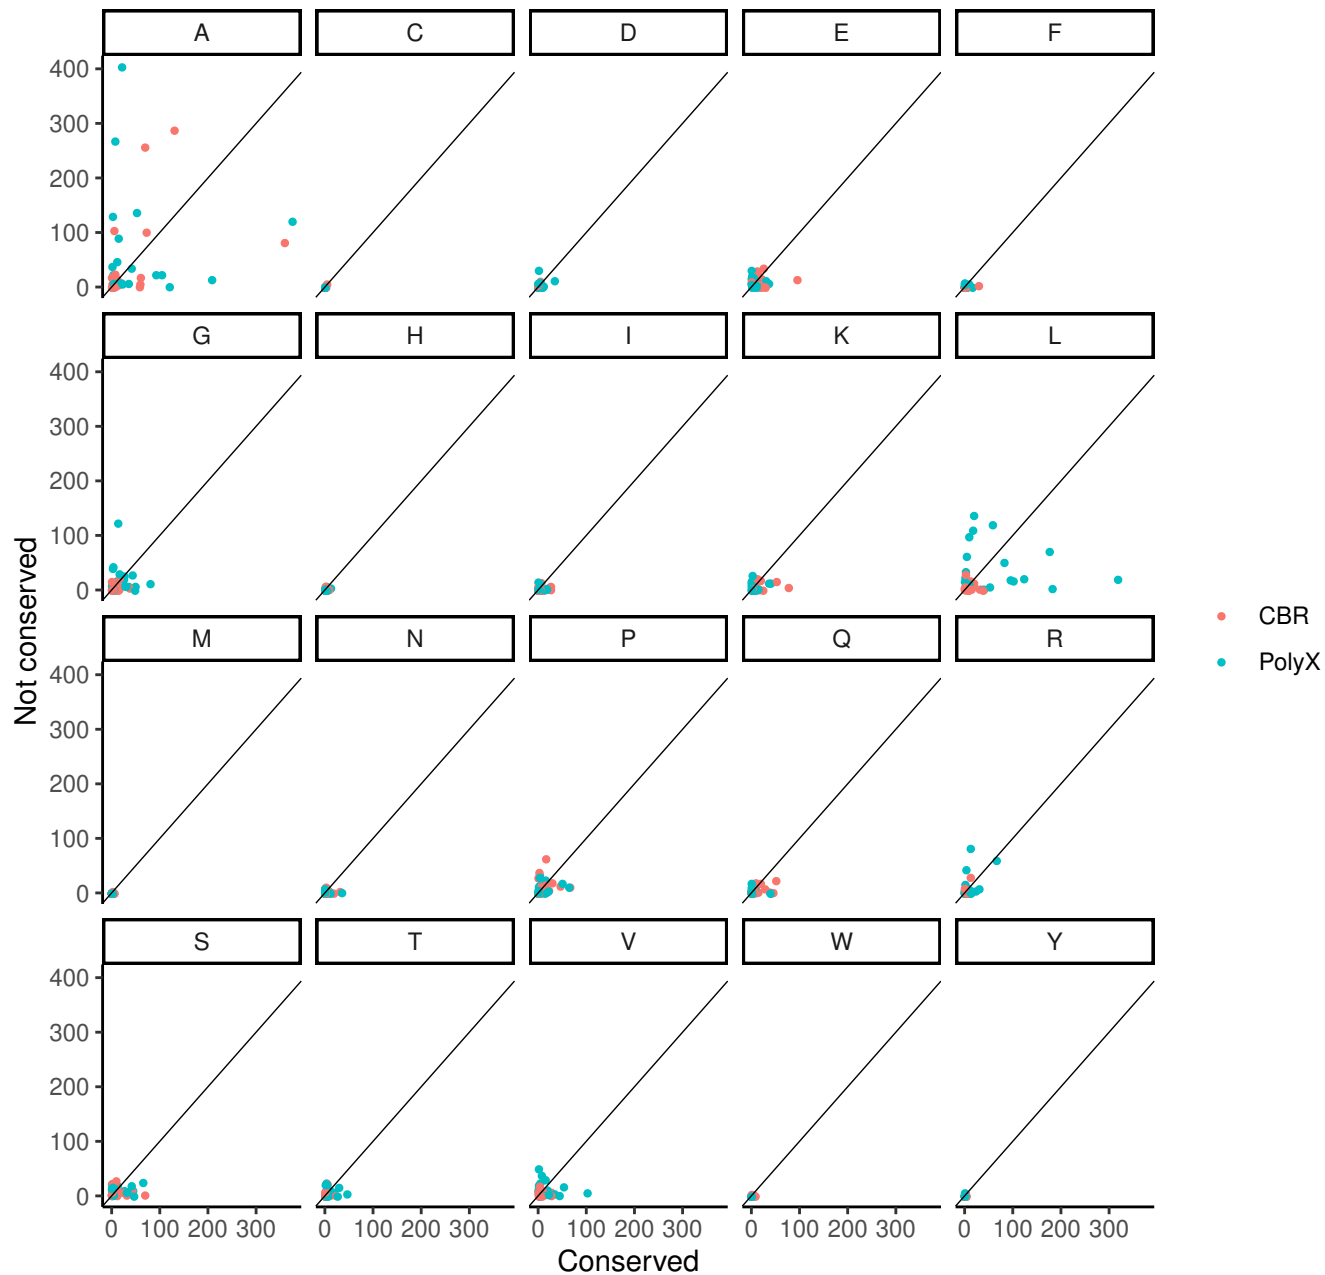

Supplement: s1 [file s1]

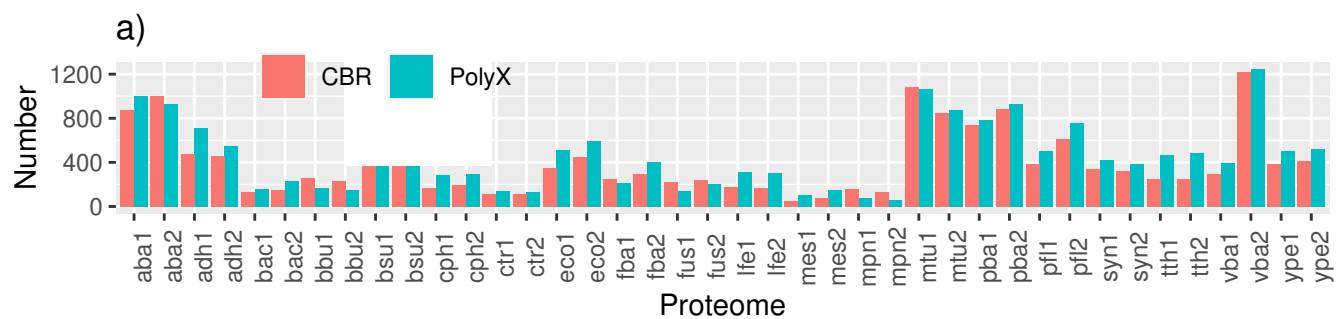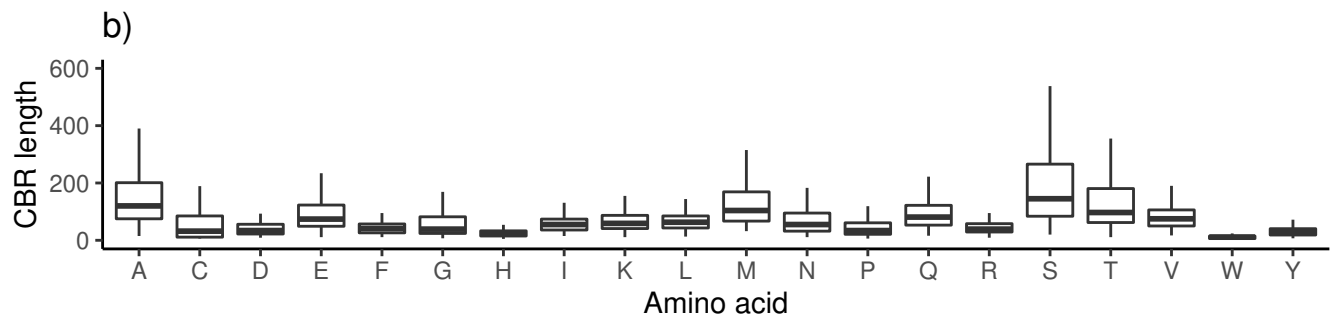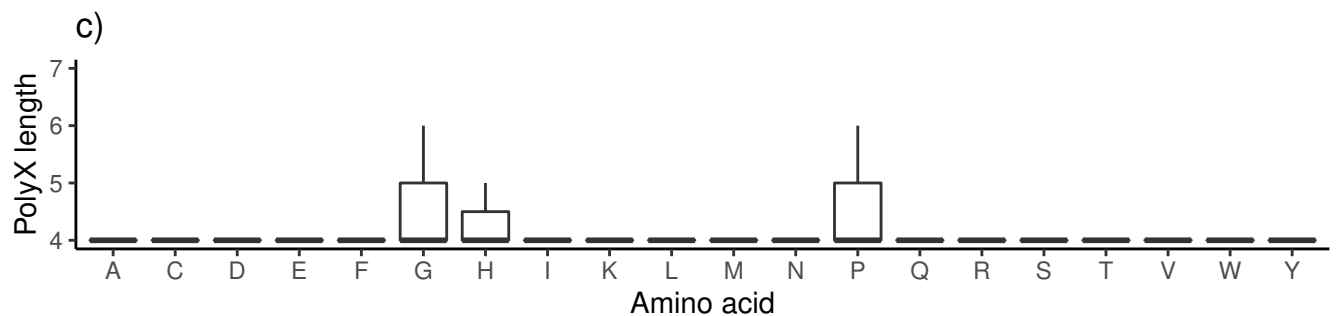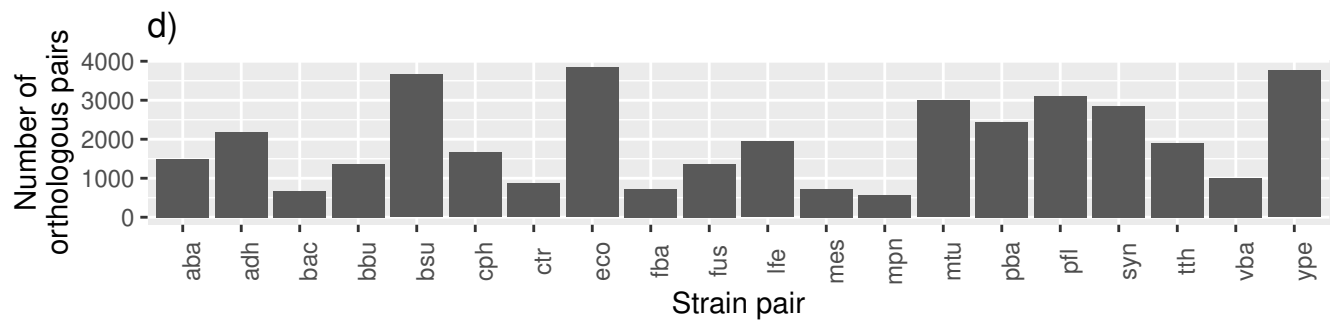

Supplement: s1 [file s1]
